# Supplementary material
Source: PubMed Central journal article supplement (PMC307616)

## Day 11.5 Gestation Sibling Embryos

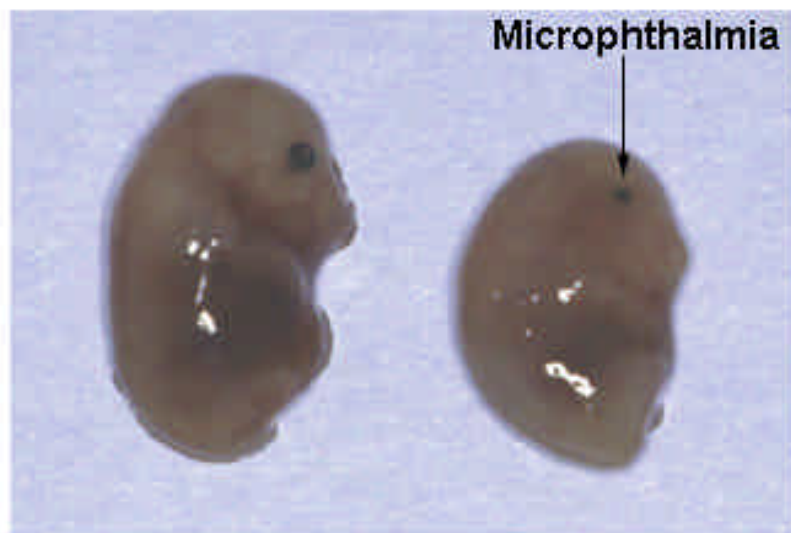

**NT**

**AS**

**NT = Nontransgenic**

**AS = GT1AS Transgenic**

Supplement: pnas_100_26_15613__2.pdf [file pnas_100_26_15613__2.pdf]

# NEWBORN SIBLINGS

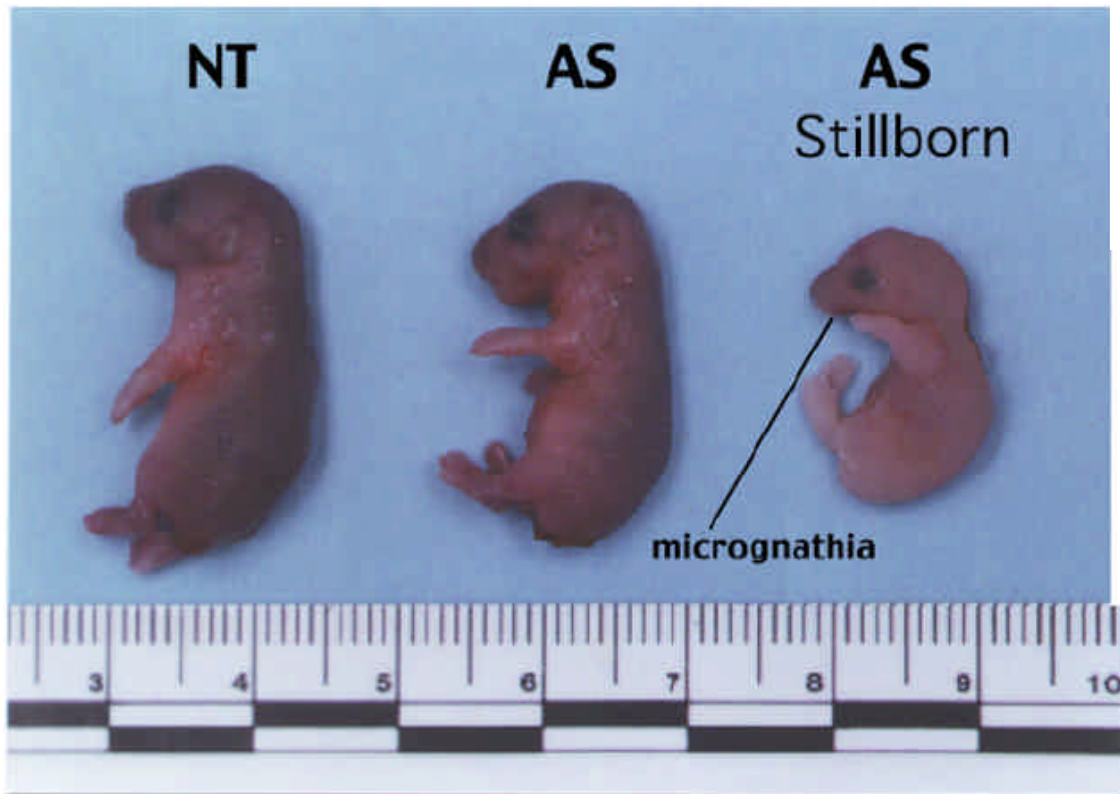

NT = Nontransgenic

AS = GT1AS Transgenic (Antisense-GLUT1)

Supplement: pnas_100_26_15613__4.pdf [file pnas_100_26_15613__4.pdf]
